# Supplementary material
Source: publisher figshare collection journal article supplement (https://acs.figshare.com/ndownloader/files/3872794)
Supplement: Supplementary file 1 [file 3872794]

## Supporting Information

# Photoresponsive Supramolecular Architectures Based on Polypeptide Hybrids

Daniela Mazzier,<sup>†</sup> Marco Maran,<sup>†</sup> Omar Polo Perucchin,<sup>†</sup> Marco Crisma,<sup>‡\*</sup> Mirco Zerbetto,<sup>†</sup> Valerio Causin,<sup>†</sup> Claudio Toniolo,<sup>†,‡</sup> and Alessandro Moretto<sup>†,‡,\*</sup>

<sup>†</sup>Department of Chemical Sciences, University of Padova, 35131 Padova, Italy

<sup>‡</sup>Institute of Biomolecular Chemistry, Padova Unit, CNR, 35131 Padova, Italy

### CONTENT

|                                                                                                                                                                     |           |
|---------------------------------------------------------------------------------------------------------------------------------------------------------------------|-----------|
| Figure S1. HPLC profiles of compound <b>5</b>                                                                                                                       | p.S2      |
| Figure S2. <sup>1</sup> H NMR spectra of compound <b>5</b>                                                                                                          | p.S3      |
| Figure S3. UV-Vis absorption spectra of compound <b>5</b>                                                                                                           | p.S3      |
| Figure S4-5. HPLC profiles of compound <b>11</b>                                                                                                                    | p.S4-S5   |
| Figure S6. UV-Vis absorption spectra of compound <b>11</b>                                                                                                          | p.S6      |
| Figure S7. <sup>1</sup> H NMR spectra of compound <b>11</b>                                                                                                         | p.S6      |
| Figure S8. DLS profile of CF-vesicles from C <sub>2</sub> -symmetry PBLG                                                                                            | p.S7      |
| Figure S9. TEM images of high MW C <sub>3</sub> -symmetry PBLG microstructures                                                                                      | p.S8      |
| Figure S10. UV-Vis absorption and ECD spectra of C <sub>3</sub> -symmetry PBLG                                                                                      | p.S9      |
| Figure S11. ECD spectrum of C <sub>3</sub> -symmetry PBLG (high MW polymer)                                                                                         | p.S9      |
| Figures S12-S14. FT-IR absorption spectra of C <sub>2</sub> - and C <sub>3</sub> -symmetry PBLGs<br>in KBr disks                                                    | p.S10-S11 |
| Figures S15-S26. <sup>1</sup> H NMR spectra of all compounds reported in this work<br>and <sup>13</sup> C NMR spectra of the final compounds <b>5</b> and <b>11</b> | p.S12-S17 |

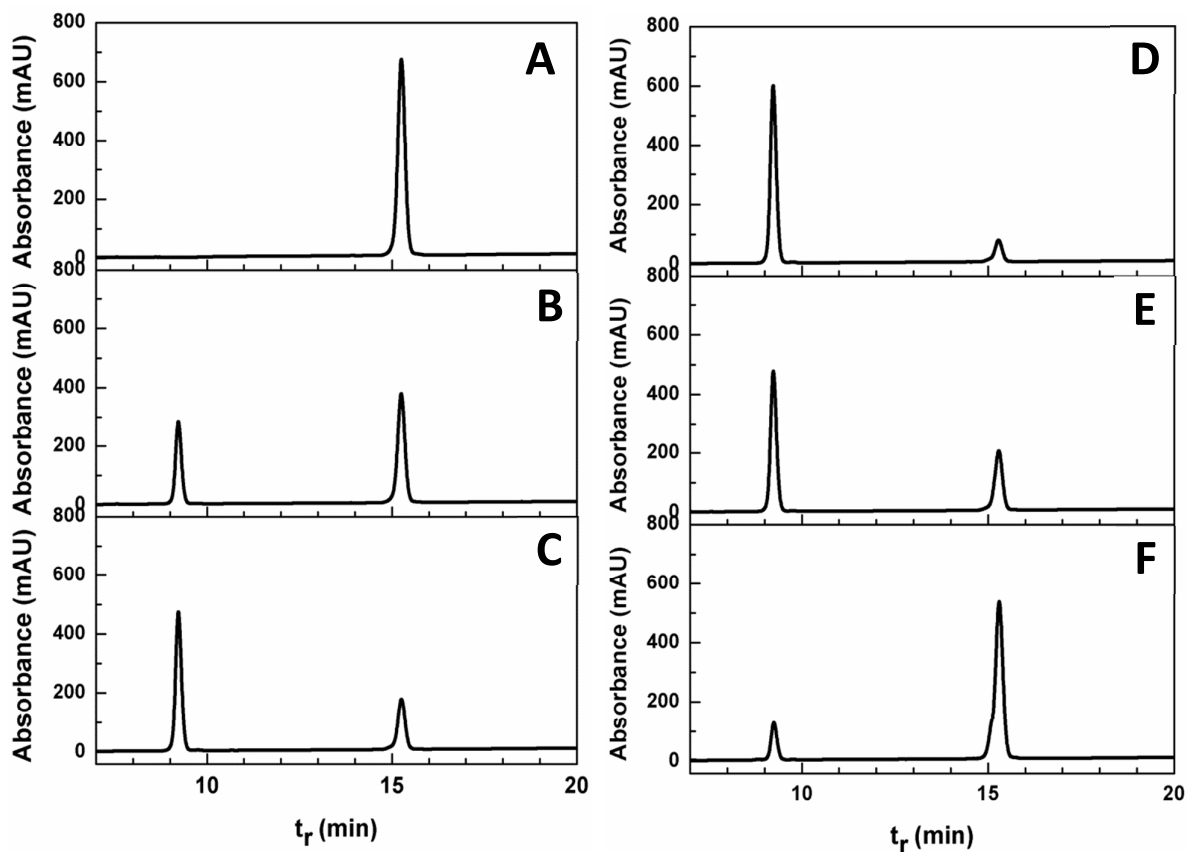

**Figure S1:** HPLC profiles of the reversible photoisomerization of H-*bis*AzoPhe-OMe (**5**): *trans* form (**A**), and after irradiation at 365 nm for, respectively, 10 s (**B**), 20 s (**C**), and 40 s (**D**). The isomerization reaches its photostationary state (nearly quantitative conversion to the *cis* form) after 40 s. Further irradiation (up to 1 h) at 365 nm led to an identical HPLC profile as in **D**.

HPLC profiles obtained starting from the *cis* form (**D**) upon irradiation at 420 nm for 20 s (**E**) and 60 s (**F**).

Also in this case the isomerization to the *trans* form is nearly quantitative. After irradiation at 420 nm for 1 h an identical HPLC profile as in (**F**) was obtained.

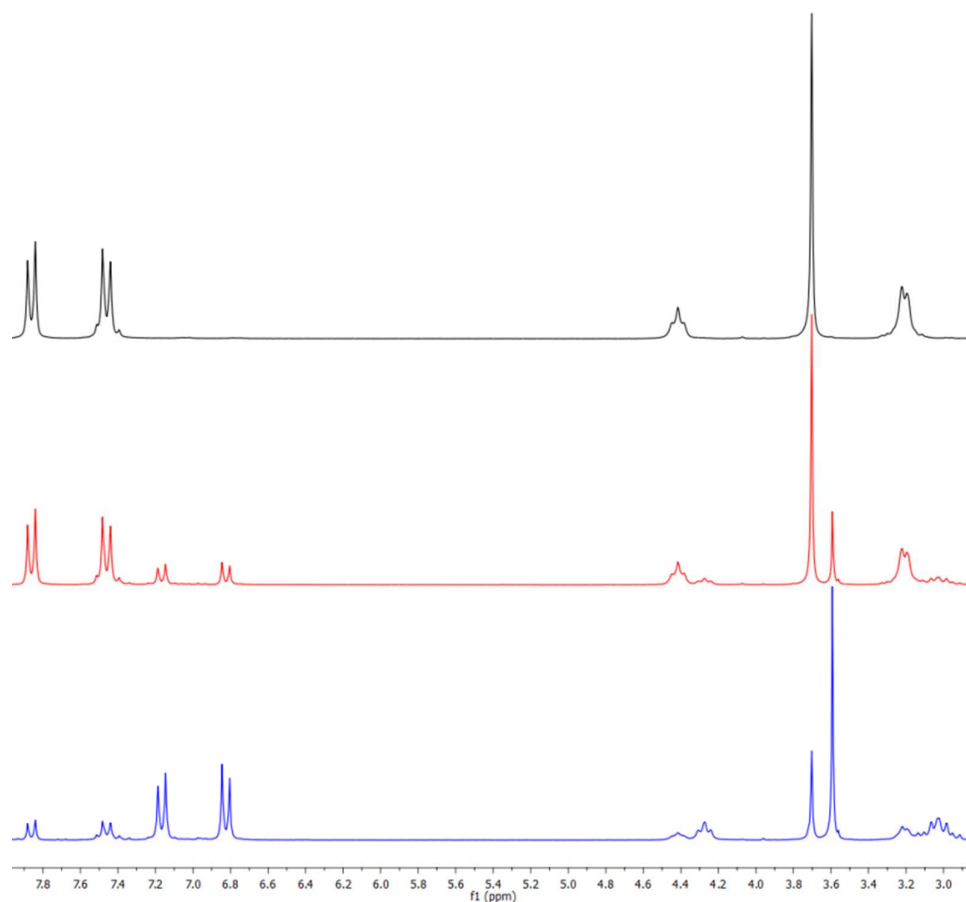

**Figure S2:**  $^1\text{H}$  NMR spectra of (**5**) in DMSO,  $\text{d}_6$  in the *trans* form (black) and after different times of irradiation at 365 nm: 20 s (red) and 40 s (blue).

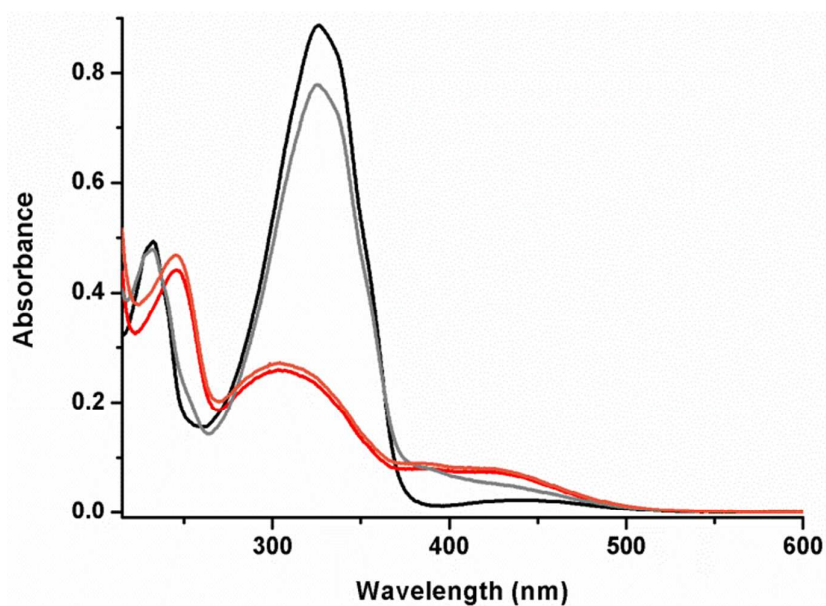

**Figure S3:** UV-Vis absorption spectra of (**5**) in MeOH showing the reversible *trans/cis* isomerization for two cycles (black lines, *trans* form; red lines, *cis* form).

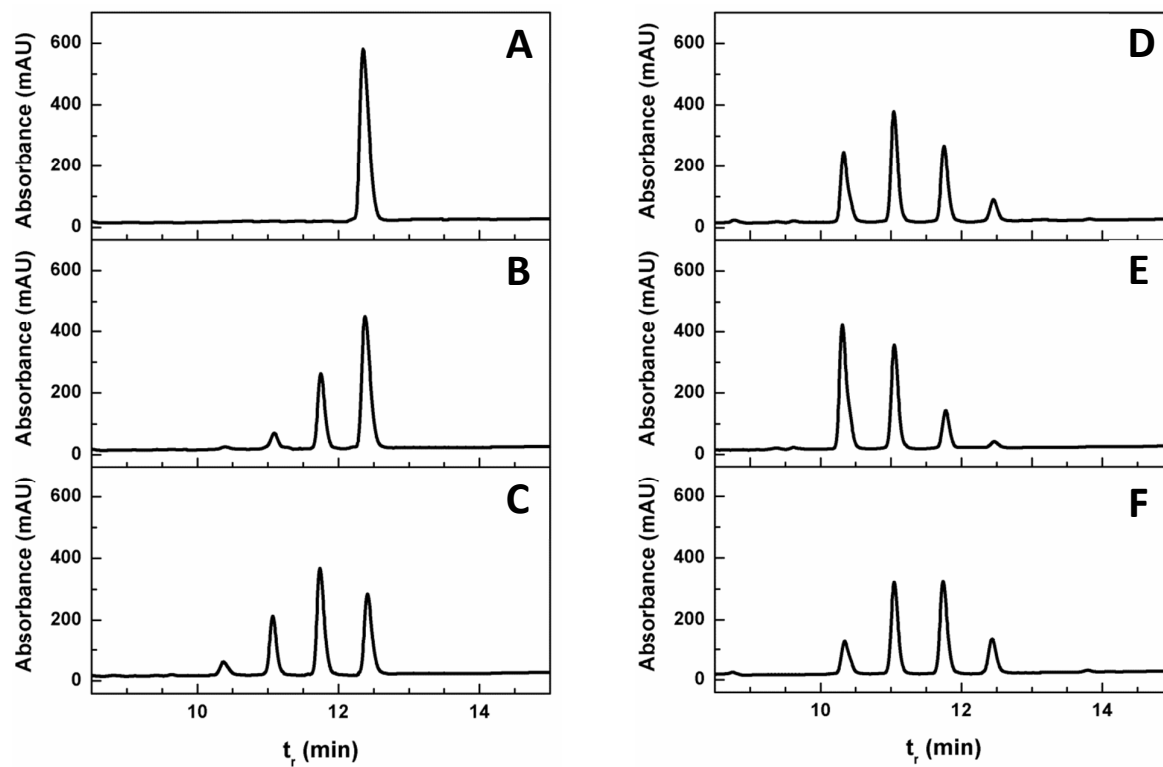

**Figure S4:** HPLC profiles of the reversible photoisomerization of compound (**11**): all *trans* form (**A**), and after irradiation at 365 nm for, respectively, 15 s (**B**), 30 s (**C**), 1 min (**D**), and 2 min (**E**). The isomerization reaches its photostationary state after 2 min. Longer irradiation times at 365 nm led to an identical HPLC profile as in **E**. The equilibrium profile after 1 h irradiation at 365 nm followed by 12 h in the dark is given in (**F**).

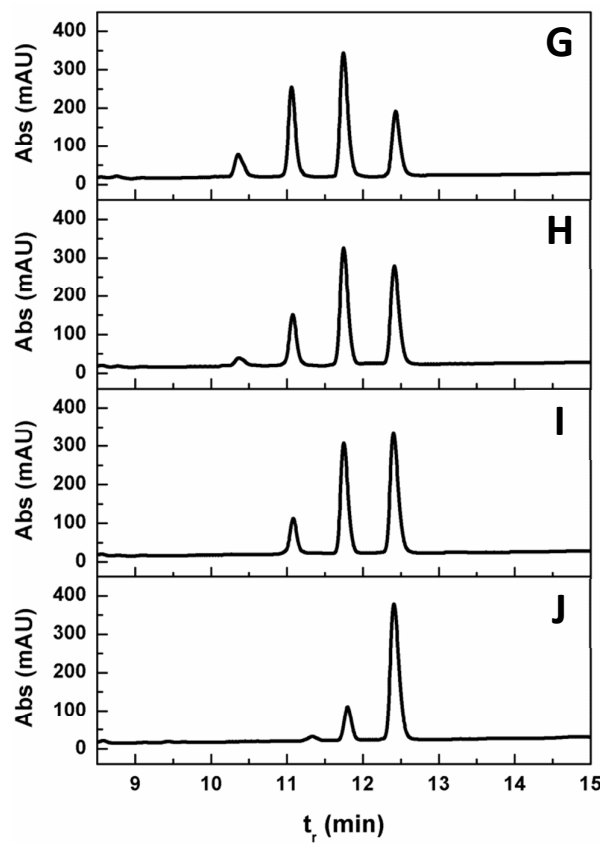

**Figure S5:** HPLC profiles of the photoisomerization of compound (**11**), starting from the equilibrium form (Figure S4, **F**), and irradiated at 420 nm for, respectively, 20 s (**G**), 40 s (**H**), 80 s (**I**), and 30 min (**J**).

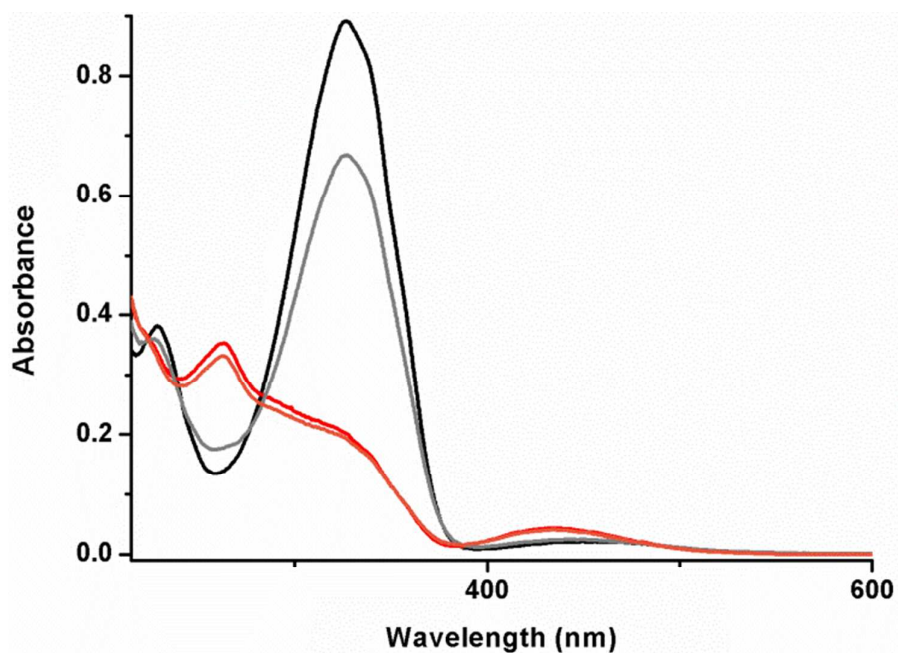

**Figure S6:** UV-Vis absorption spectra of compound (**11**) in MeOH showing the reversible *trans/cis* isomerization for two cycles (black lines, *trans* form; red lines, *cis* form).

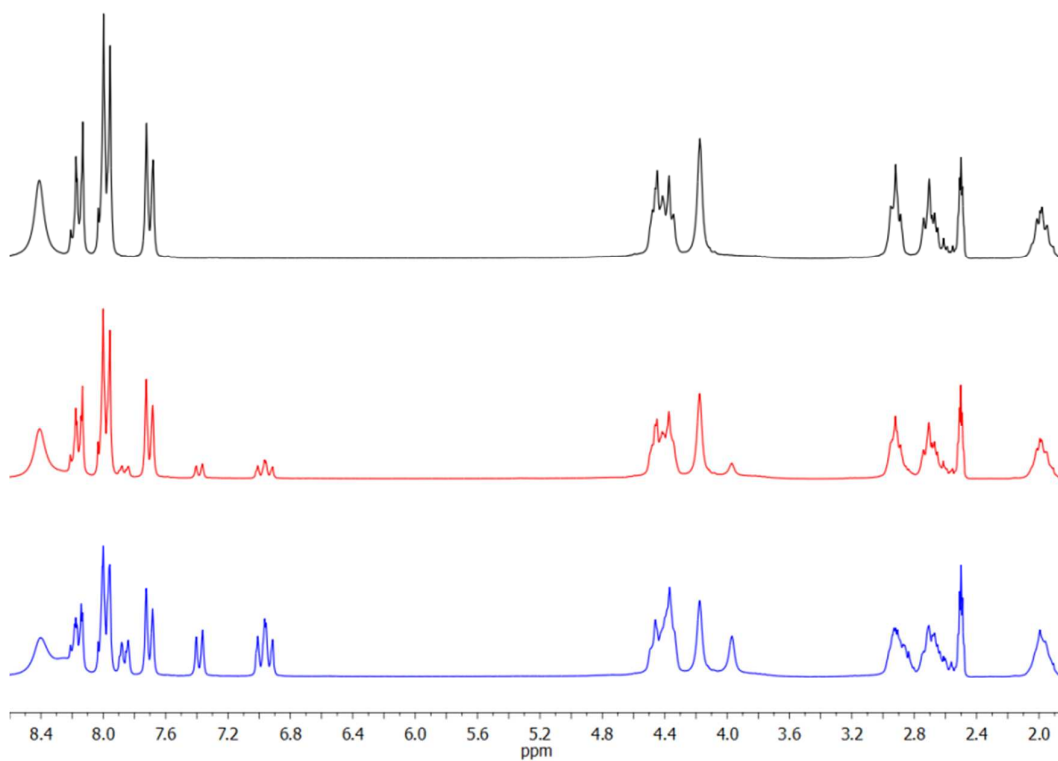

**Figure S7:** <sup>1</sup>H NMR spectra of compound (**11**) in DMSO, *d*<sub>6</sub> in the *trans* form (black) and after different times of irradiation at 365 nm: 30 s (red) and 1 min (blue).

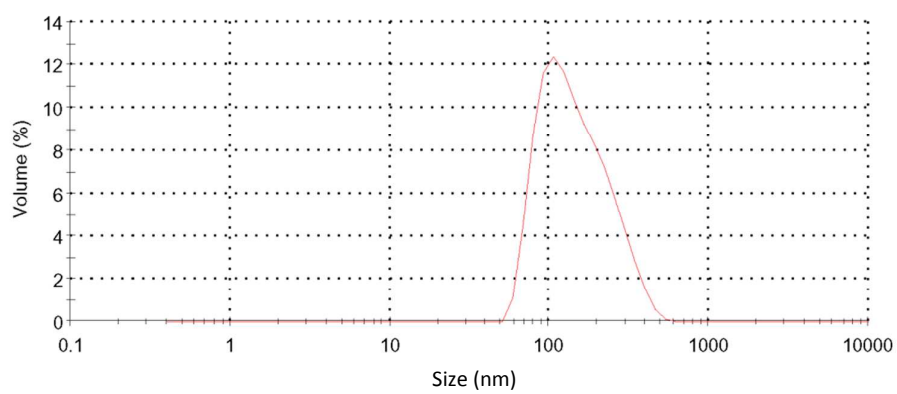

**Figure S8:** DLS profile of CF-encapsulated vesicles (see Figure 5, upper part, in the manuscript) from C<sub>2</sub>-symmetry PBLG in water.

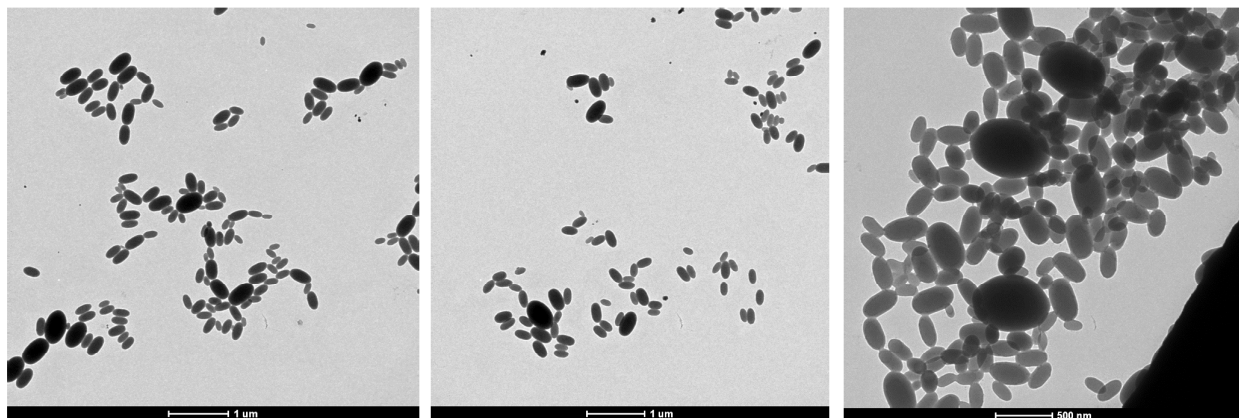

**Figure S9:** TEM images of self-assembled nanostructures from high MW  $C_3$ -symmetry PBLG under different times of irradiation at 365 nm (left, non-irradiated microstructures; center, after 30 min irradiation; right, after 3 h irradiation).



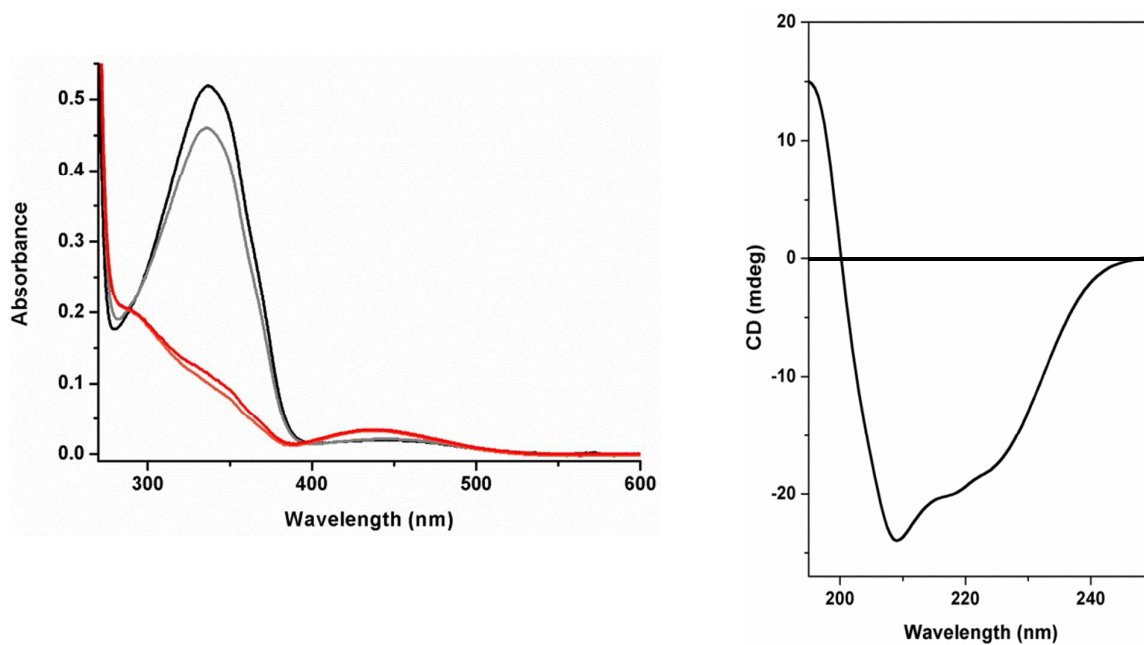

**Figure S10:** Left: UV-Vis absorption spectra of  $C_3$ -symmetry PBLG in DMF solution showing the reversible *trans/cis* isomerization for two cycles (black lines, *trans* form; red lines, *cis* form). Right: ECD spectrum of  $C_3$ -symmetry PBLG in HFIP solution.

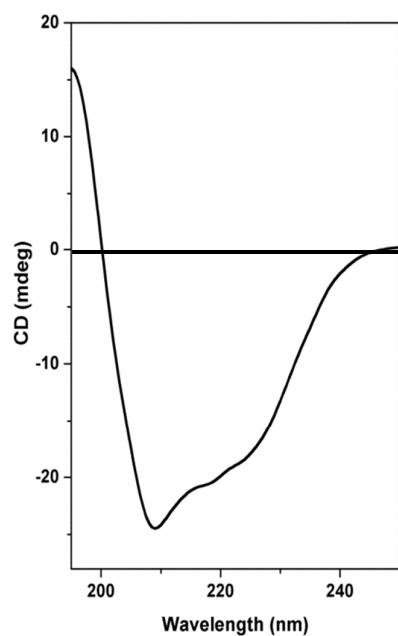

**Figure S11:** ECD spectrum of  $C_3$ -symmetry PBLG (high MW) in HFIP solution.

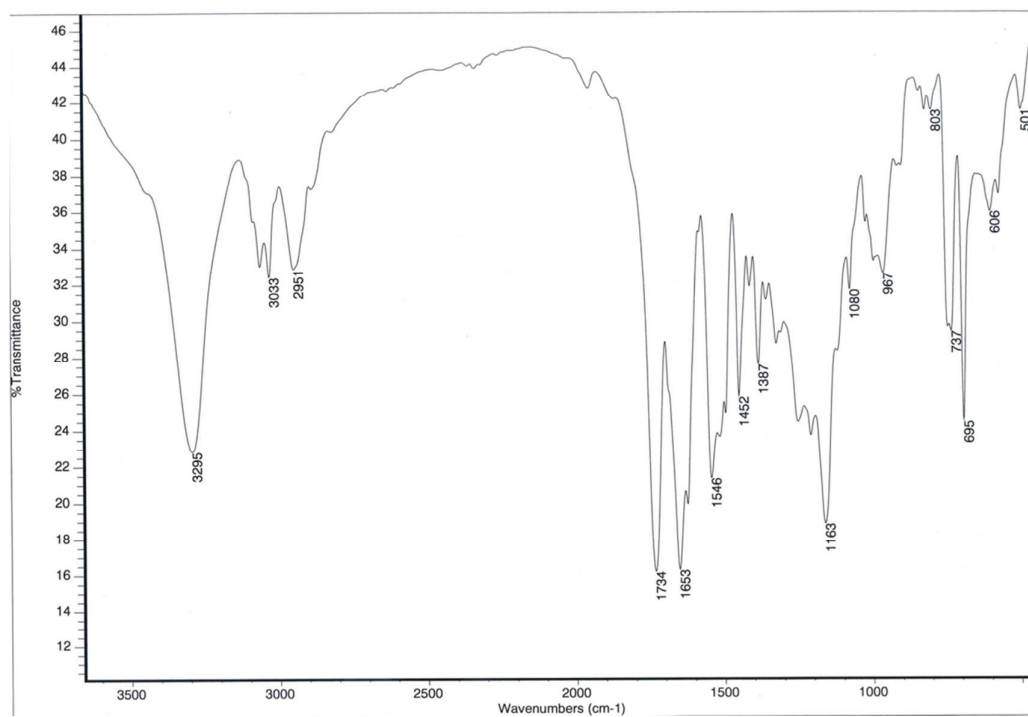

**Figure S12:** FT-IR absorption spectrum of C<sub>2</sub>-symmetry PBLG in KBr disk.

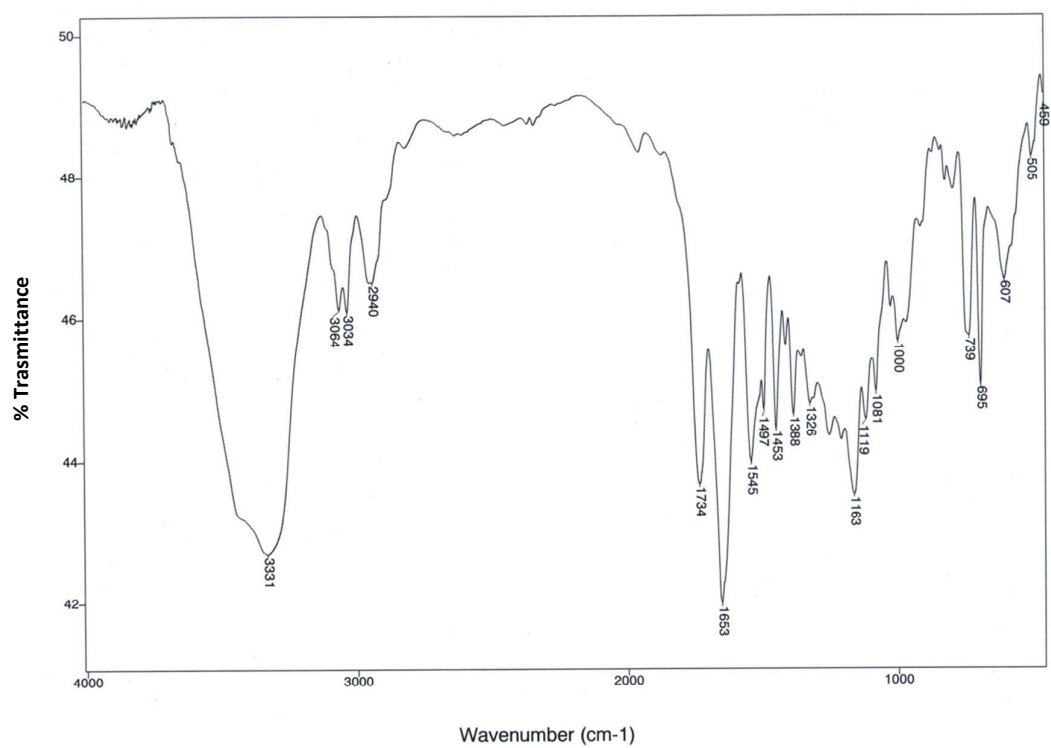

**Figure S13:** FT-IR absorption spectrum of C<sub>3</sub>-symmetry PBLG in KBr disk.

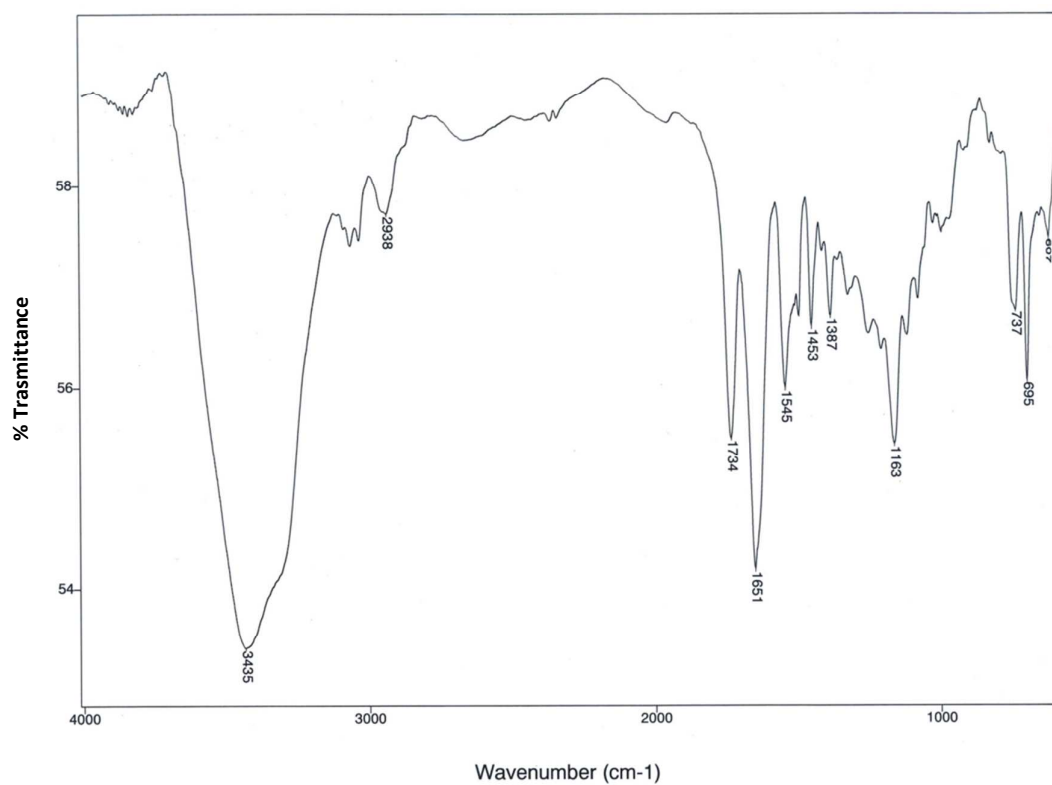

**Figure S14:** FT-IR absorption spectrum of C<sub>3</sub>-symmetry PBLG (high MW) in KBr disk.

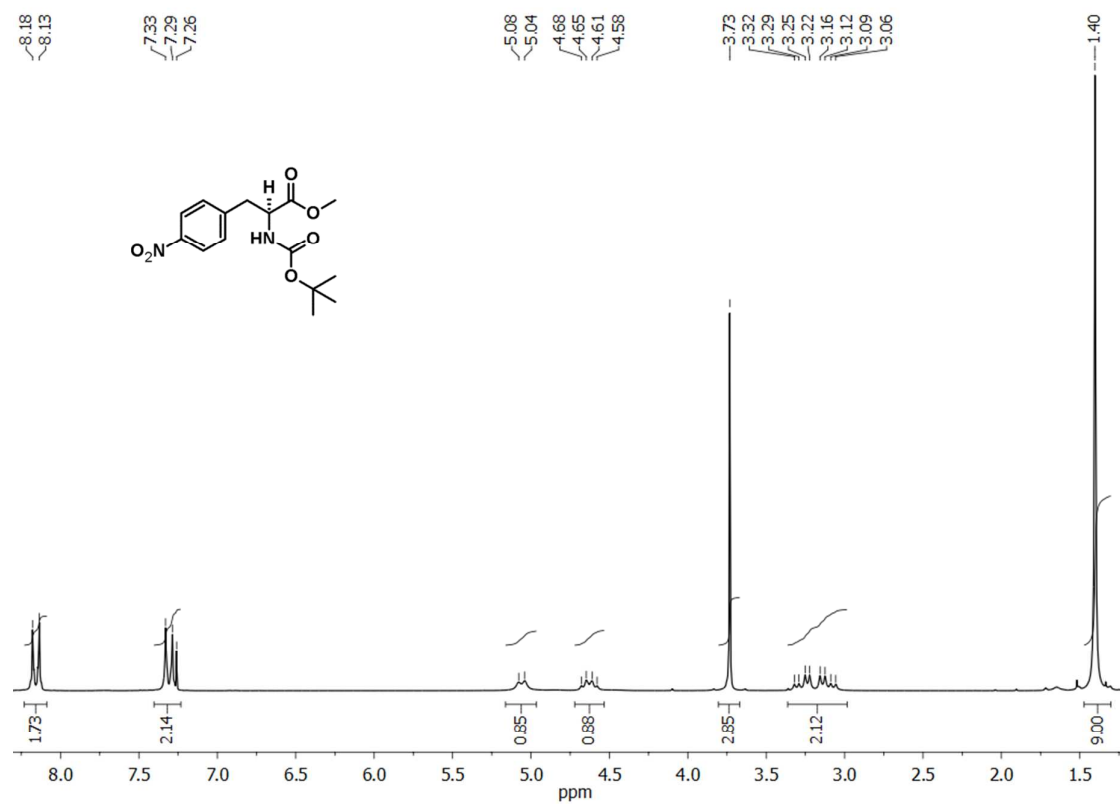

**Figure S15:** <sup>1</sup>H NMR spectrum of compound (1) in CDCl<sub>3</sub>.

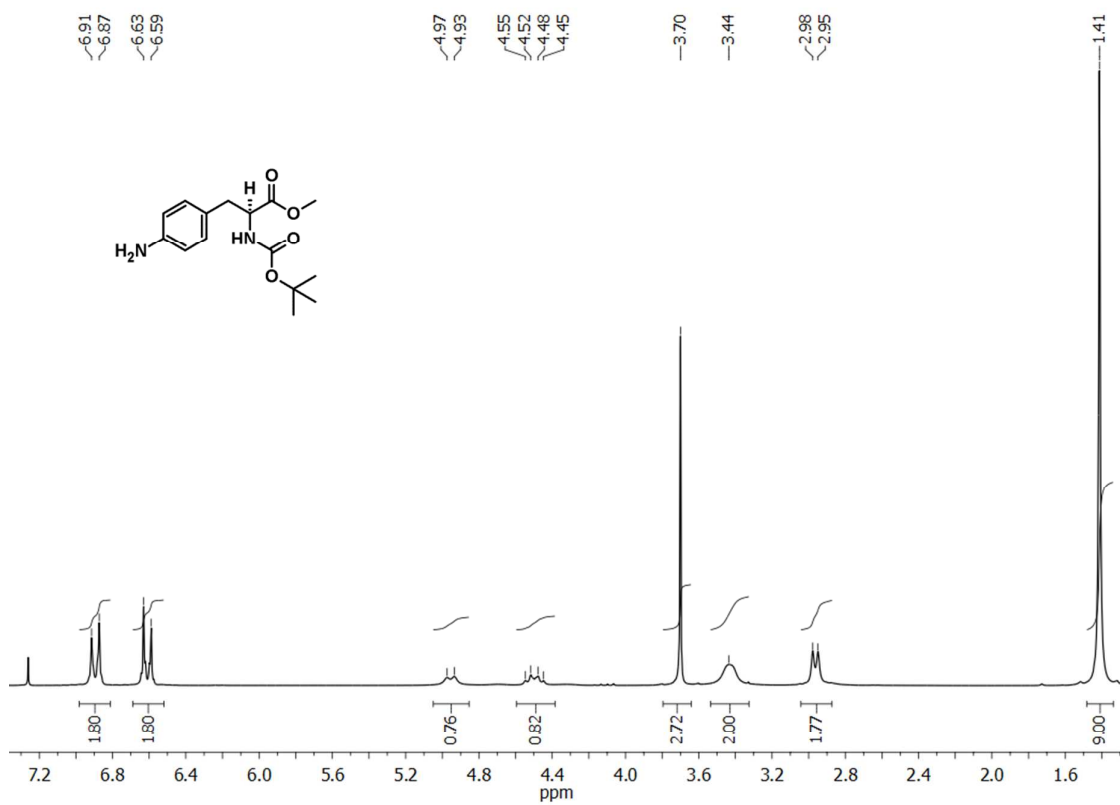

**Figure S16:** <sup>1</sup>H NMR spectrum compound of (3) in CDCl<sub>3</sub>.

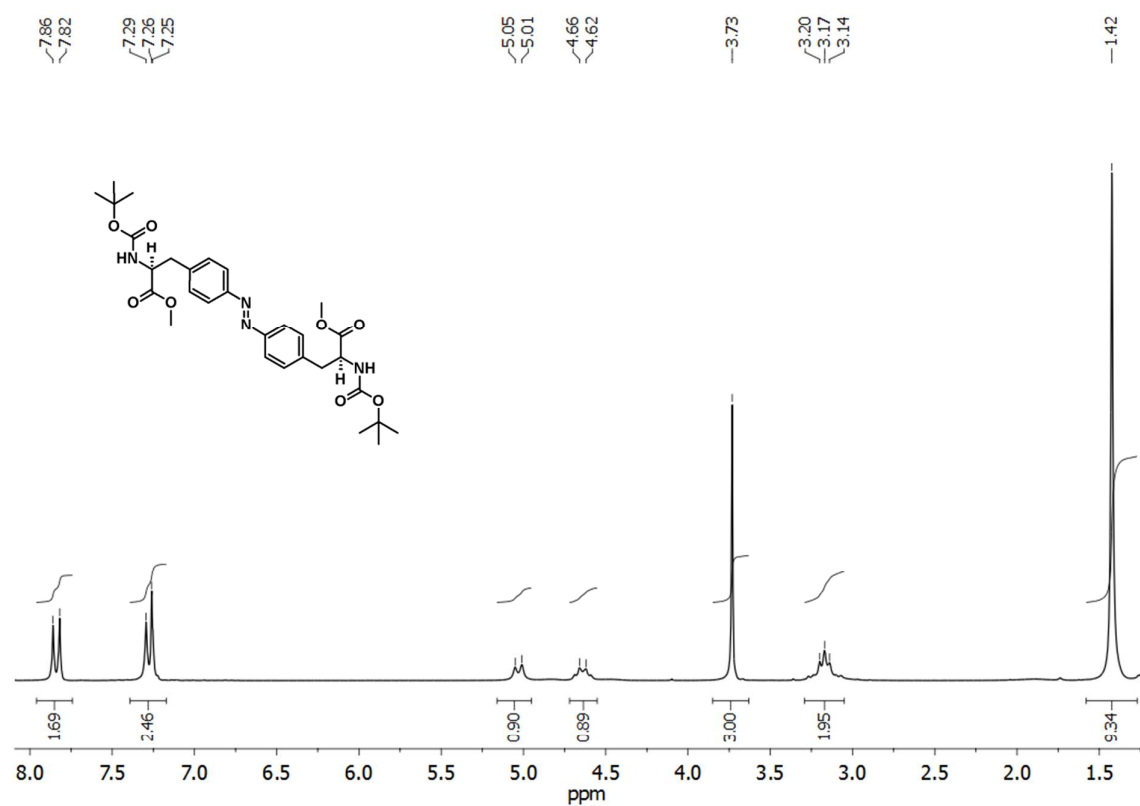

**Figure S17:** <sup>1</sup>H NMR spectrum of compound (4) in CDCl<sub>3</sub>.

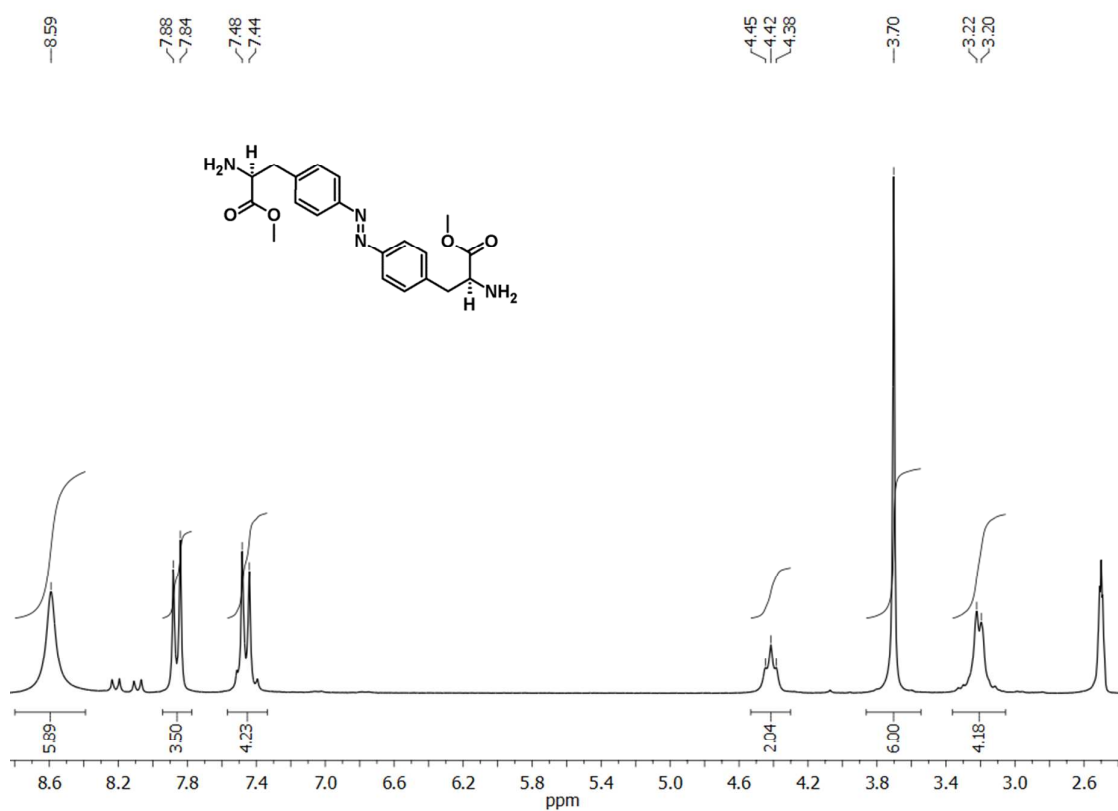

**Figure S18:** <sup>1</sup>H NMR spectrum of compound (5) in DMSO, d<sub>6</sub>.

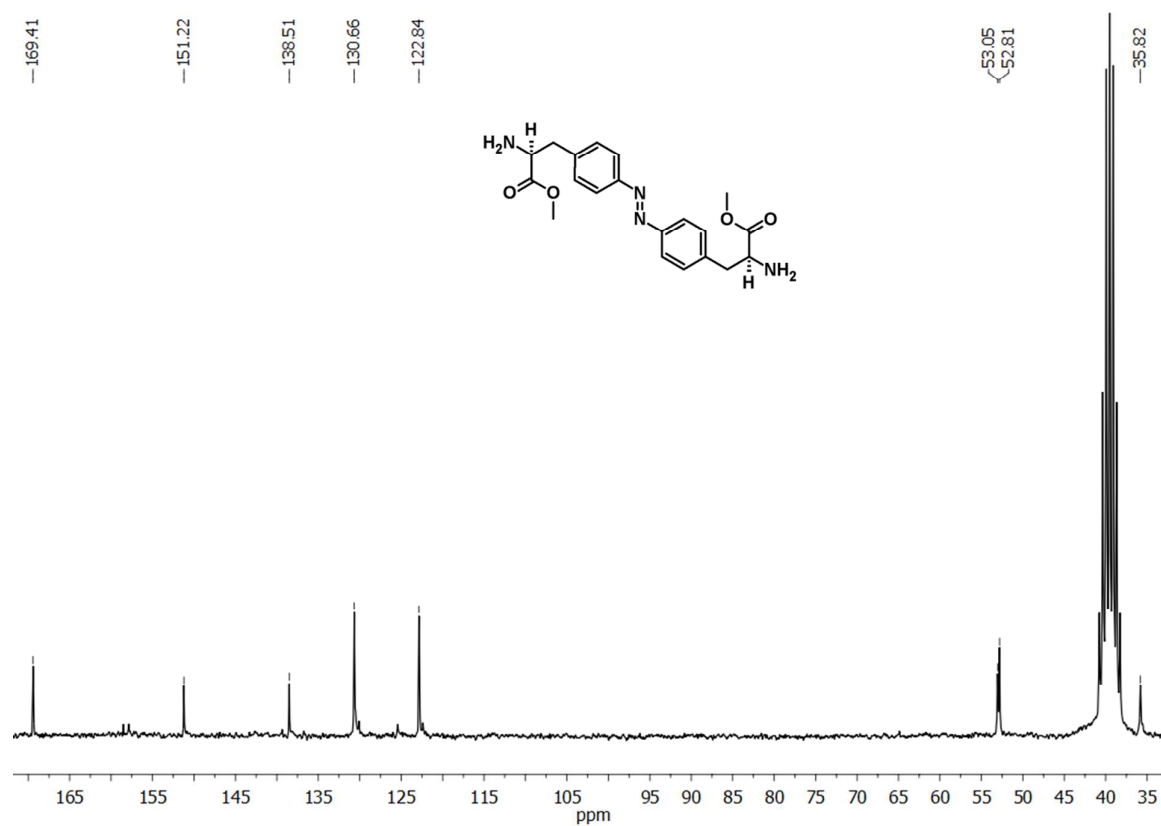

**Figure S19:** <sup>13</sup>C NMR spectrum of compound (5) in DMSO, *d*<sub>6</sub>.

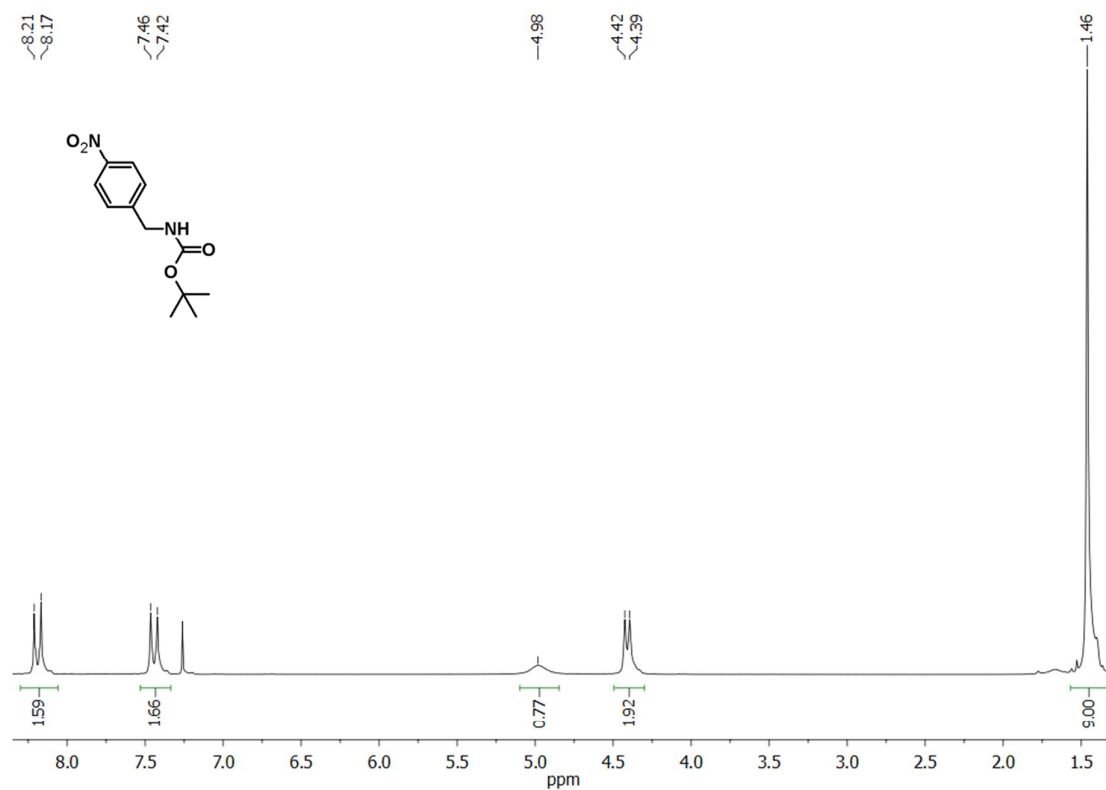

**Figure S20:** <sup>1</sup>H NMR spectrum of compound (6) in CDCl<sub>3</sub>.

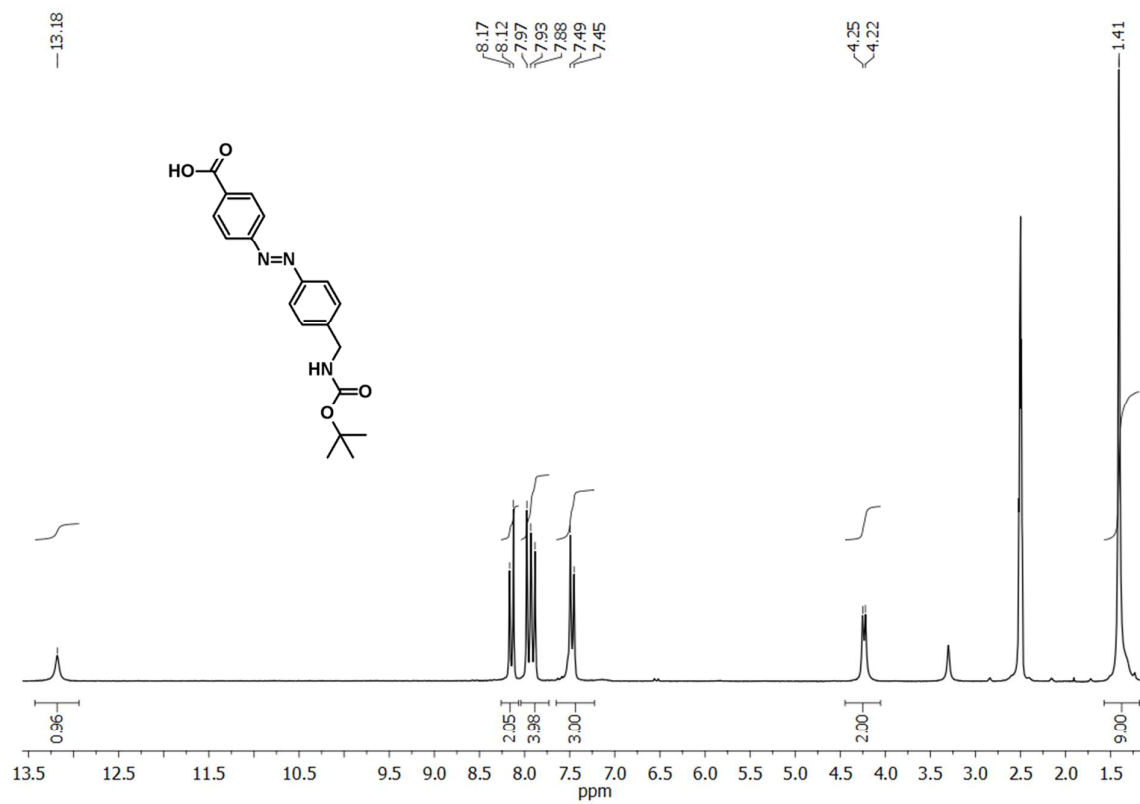

**Figure S21:** <sup>1</sup>H NMR spectrum of compound (8) in DMSO, *d*<sub>6</sub>.

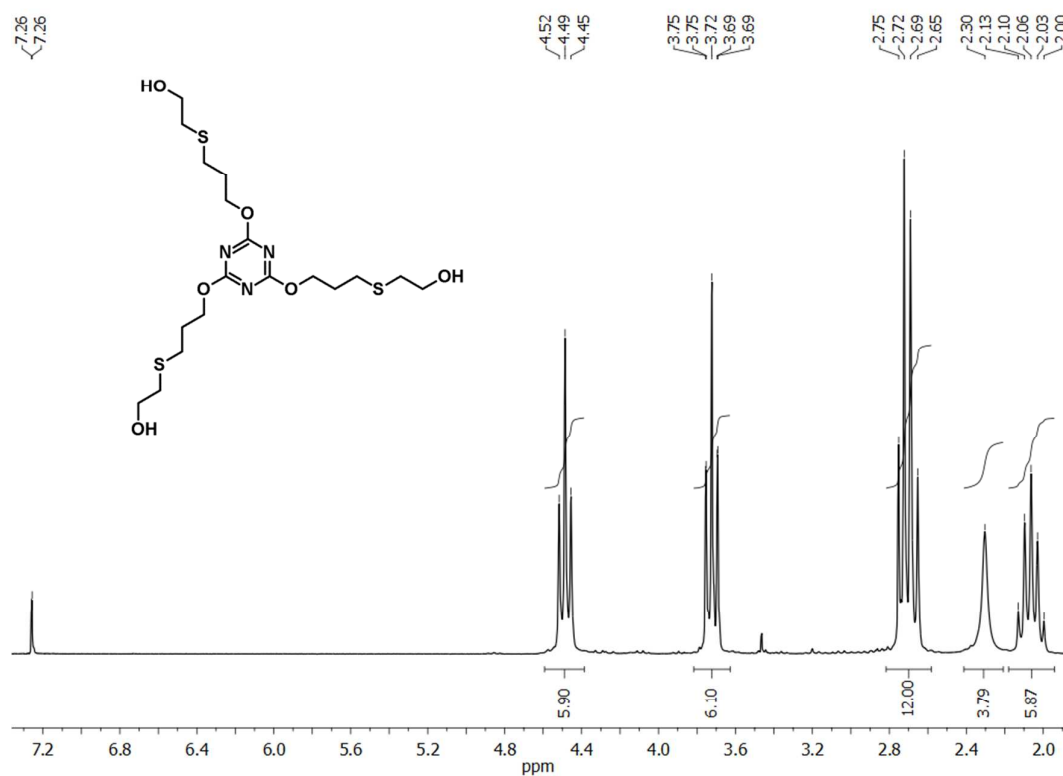

**Figure S22:** <sup>1</sup>H NMR spectrum of compound (9) in CDCl<sub>3</sub>.

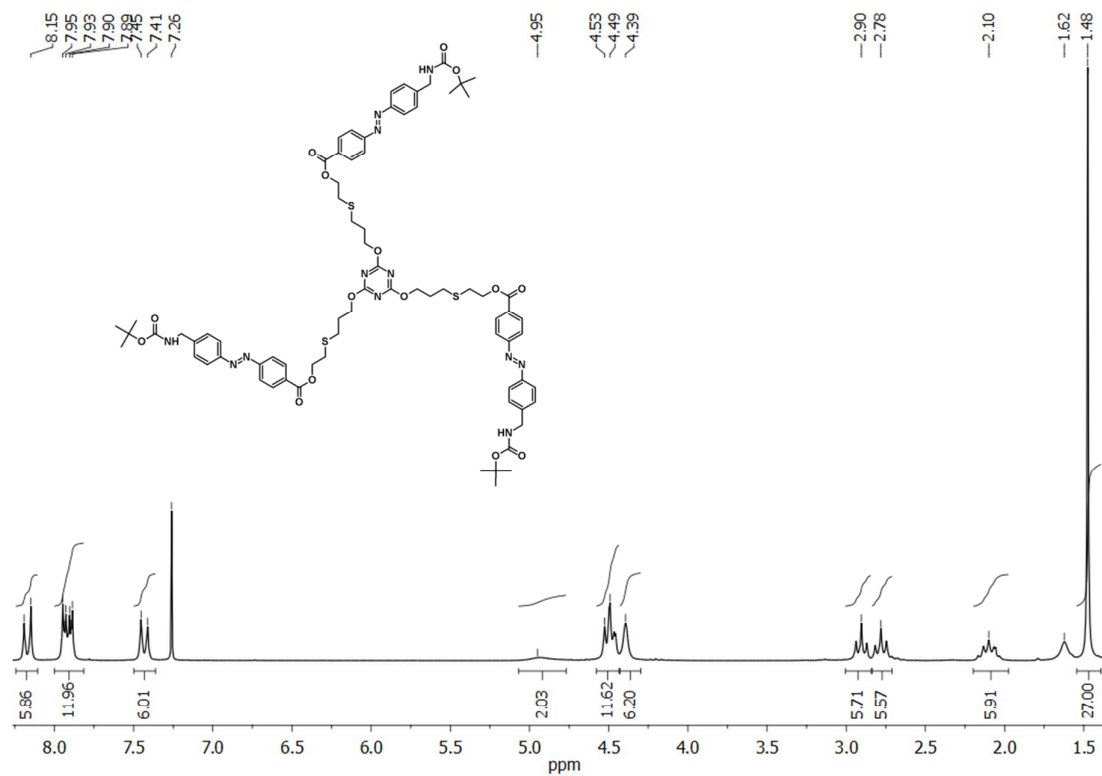

**Figure S23:** <sup>1</sup>H NMR spectrum of compound (10) in CDCl<sub>3</sub>.

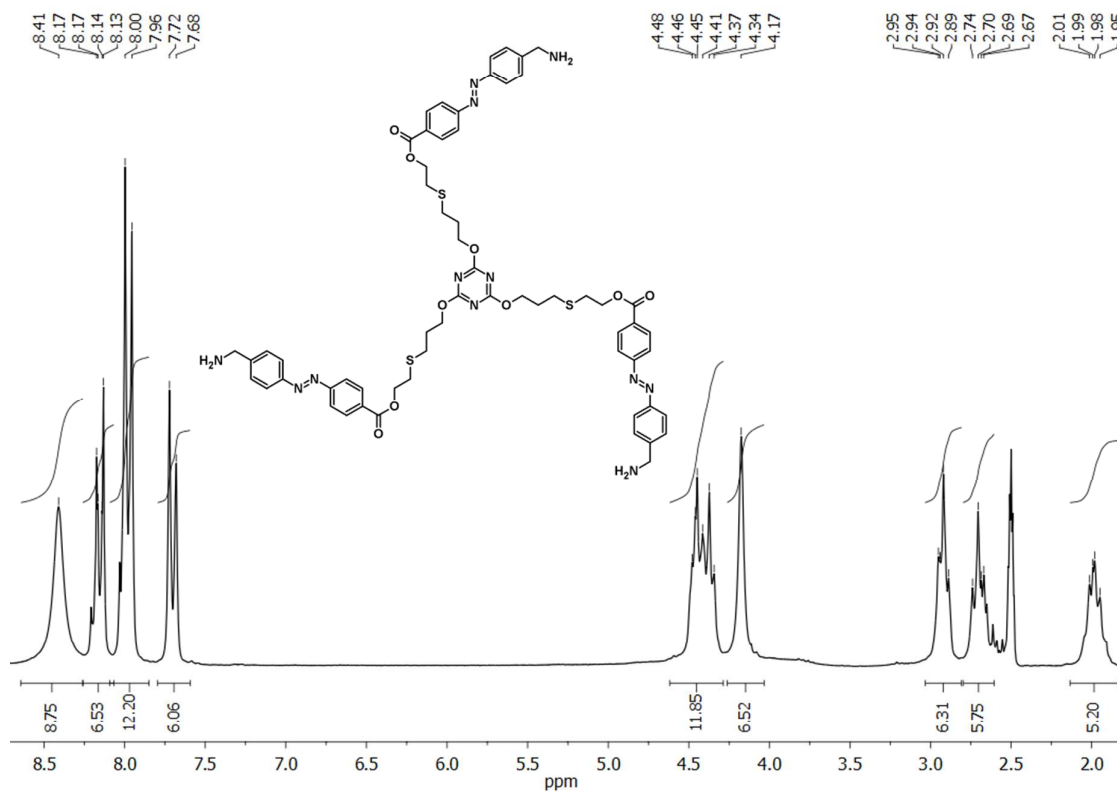

**Figure S24:** <sup>1</sup>H NMR spectrum of compound (11) in DMSO, d<sub>6</sub>.



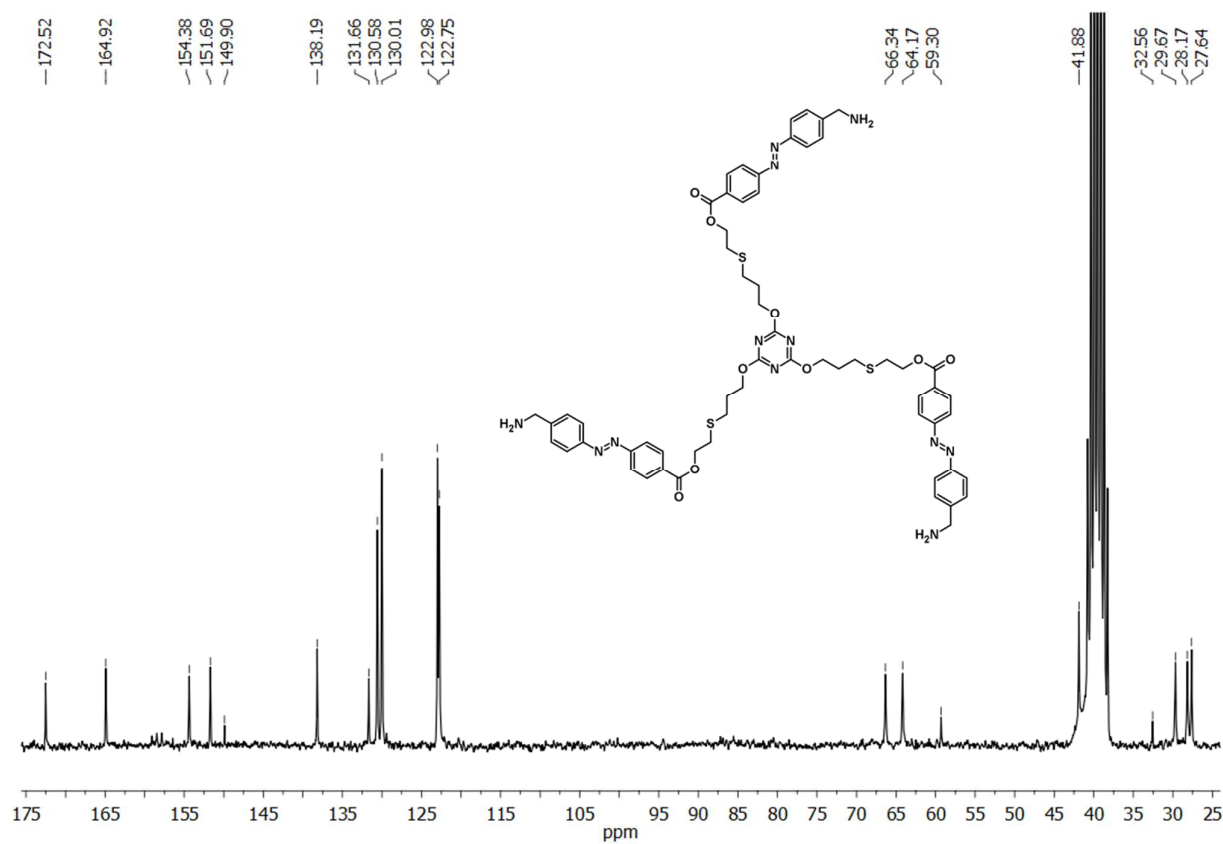

**Figure S25:** <sup>13</sup>C NMR spectrum of compound (11) in DMSO, *d*<sub>6</sub>.

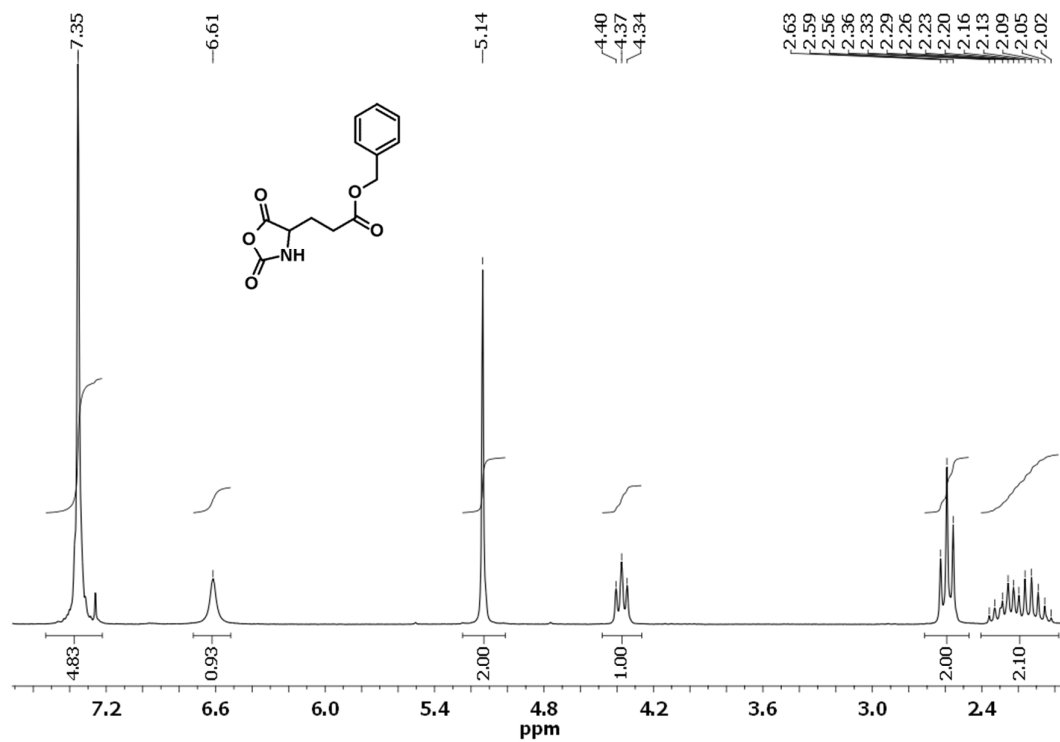

**Figure S26:** <sup>1</sup>H-NMR spectrum of BLG-NCA in CDCl<sub>3</sub>.
